# Supplementary material for: Long‐term mid‐onset dietary restriction rejuvenates hematopoietic stem cells and improves regeneration capacity of total bone marrow from aged mice
Source: PubMed Central journal article supplement (PMC7576247; doi:10.1111/acel.13241), 2020-09-15
Supplement: ACEL-19-e13241-s003.pdf [file ACEL-19-e13241-s003.pdf]

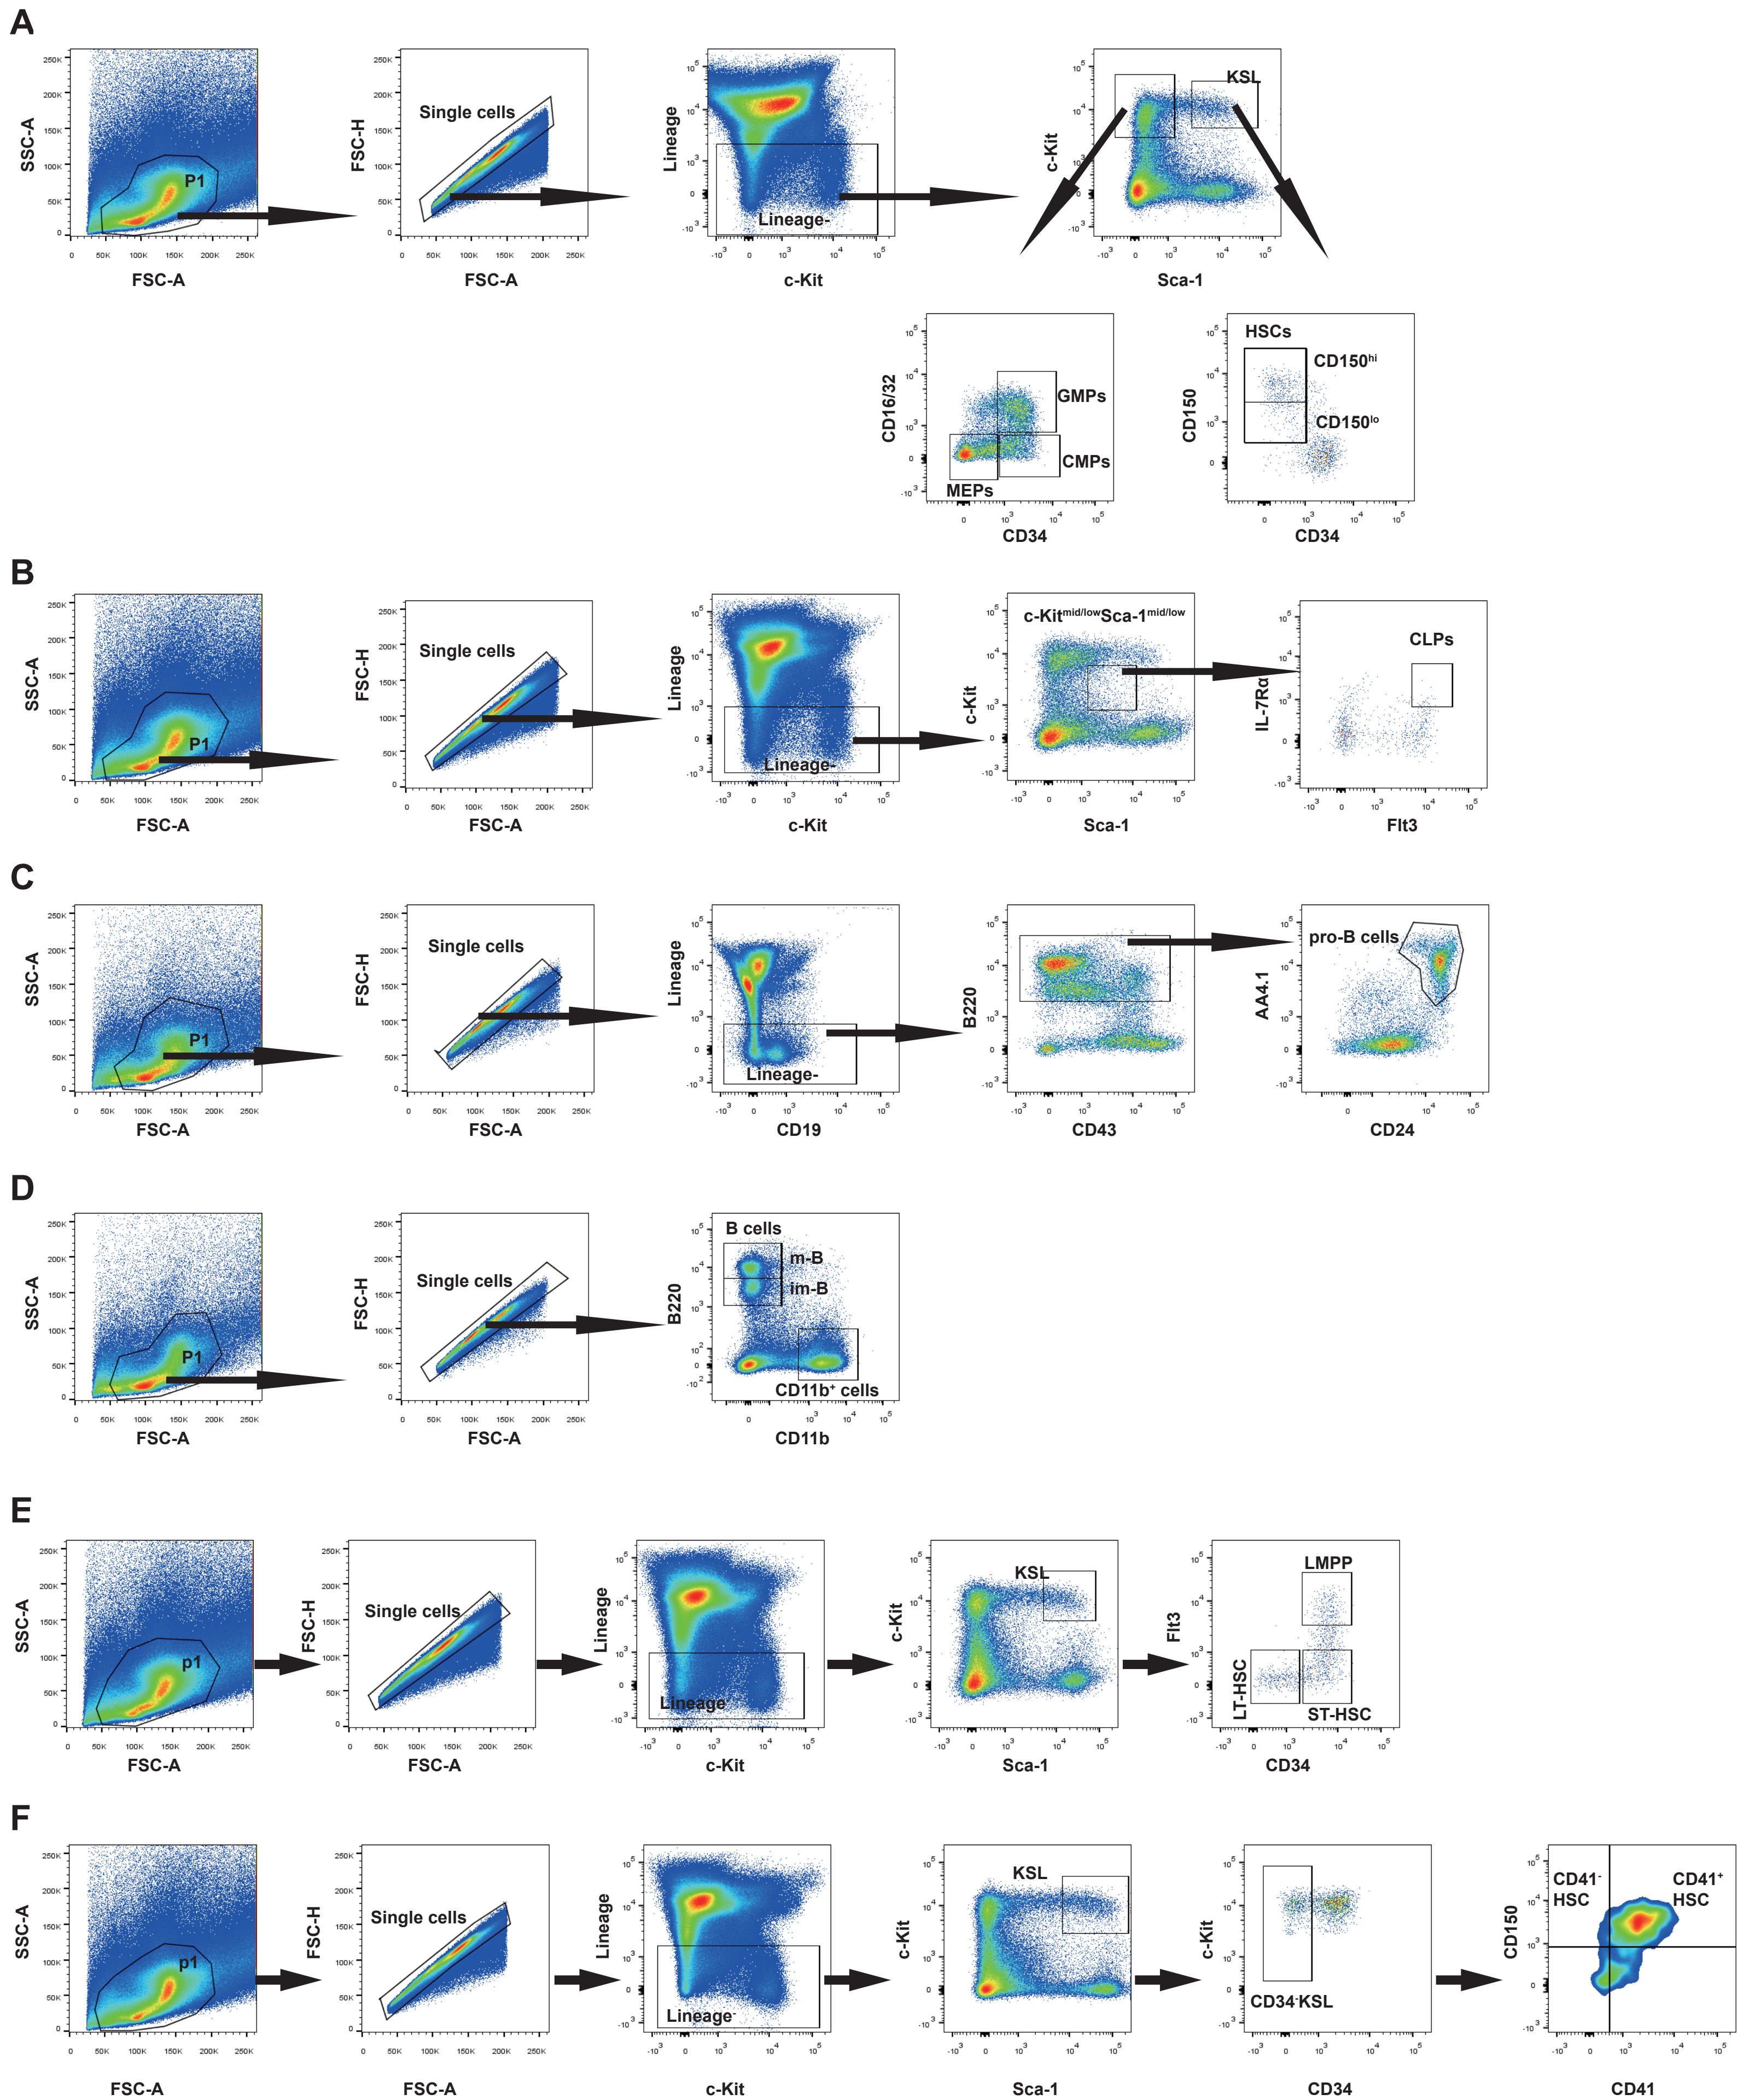

Tao and Wang et al\_Figure S3
